# Supplementary material
Source: Springer Nature journal article supplement (https://www.springermedizin.de/resource/supplementary/12879_2009_928_MOESM2_ESM.pdf/9449660)

□ : 4%DDT

■ : 0.05%Deltamethrin

■ : 0.75%Permethrin

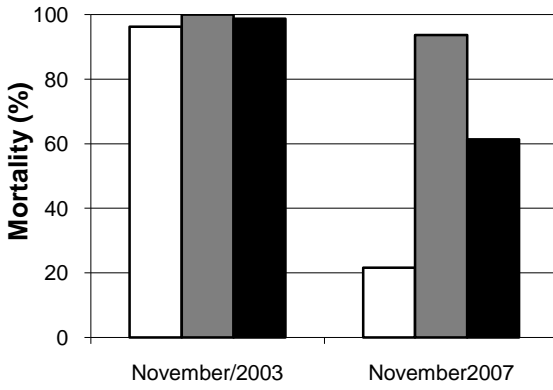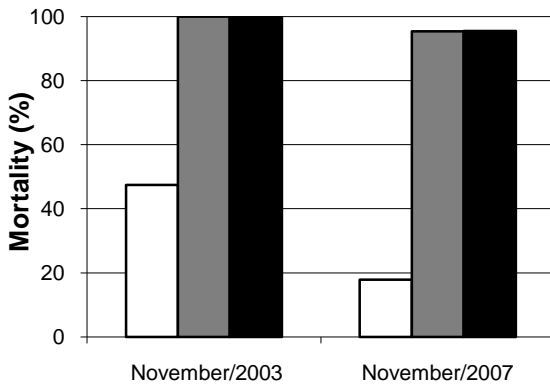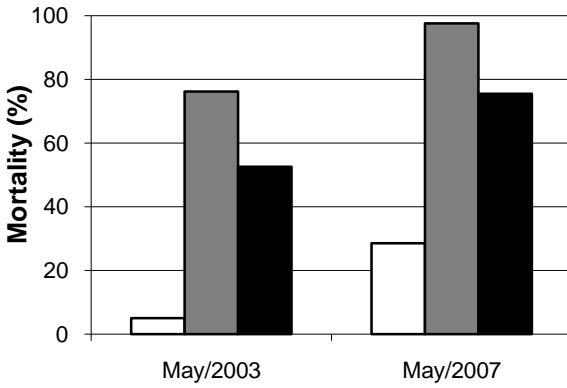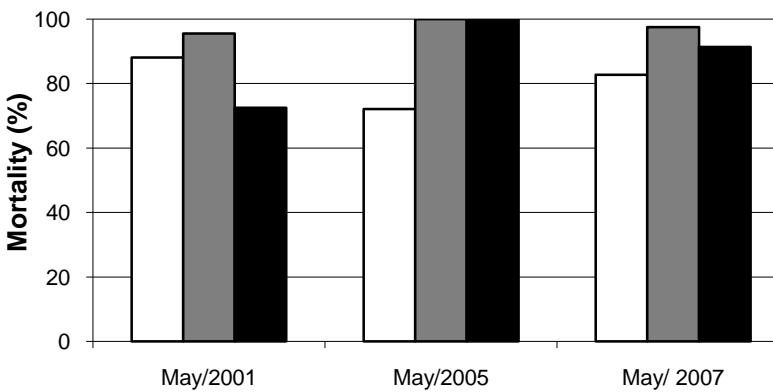

Supplement: MOESM2 [file 9449660]
